# Supplementary material for: Root Bark of Morus alba L. and Its Bioactive Ingredient, Ursolic Acid, Suppress the Proliferation of Multiple Myeloma Cells by Inhibiting Wnt/β-Catenin Pathway
Source: PubMed Central journal article supplement (PMC9706038; doi:10.4014/jmb.2109.09002), 2021-09-25
Supplement: jmb-31-11-1559-supple.pdf [file jmb-31-11-1559-supple.pdf]

## Supplementary data

**Table S1. Compound list**

| <b>Compound</b>                                  | <b>RT (min)</b> | <b>MSMS<br/>similarity</b> | <b>Area</b>   |
|--------------------------------------------------|-----------------|----------------------------|---------------|
| <i>2,3,5,6-Tetramethylpyrazine</i>               | 6.286           | 97.8                       | 23252576059.4 |
| <i>Pipecolic acid</i>                            | 1.557           | 88.2                       | 16962426677.8 |
| <i>Adenosine</i>                                 | 2.037           | 96.4                       | 13092760204.6 |
| <i>Betaine</i>                                   | 1.466           | 91.5                       | 9765144346.1  |
| <i>9-Oxo-10(E),12(E)-octadecadienoic acid</i>    | 22.112          | 91.5                       | 8778321282.5  |
| <i>Esculin</i>                                   | 7.136           | 88.3                       | 7191291100.7  |
| <i>Scopoletin</i>                                | 7.405           | 89.6                       | 6589184708.1  |
| <i>Choline</i>                                   | 1.423           | 87.8                       | 5816093510.1  |
| <i>Hexadecanamide</i>                            | 25.852          | 94                         | 4802281361.2  |
| <i>D,L-Camphor</i>                               | 8.399           | 93.6                       | 4539504142.0  |
| <i>L-Phenylalanine</i>                           | 3.565           | 96.1                       | 4004785153.8  |
| <i>L-Isoleucine</i>                              | 2.328           | 85.7                       | 3632272948.4  |
| <i>Indole-3-acrylic acid</i>                     | 6.476           | 93.3                       | 3627603683.7  |
| <i>7-Hydroxycoumarine</i>                        | 7.002           | 94.7                       | 3097087245.1  |
| <i>Luteolin</i>                                  | 12.349          | 80.6                       | 2877244051.6  |
| <i>4-Guanidinobutyric acid</i>                   | 1.897           | 91.9                       | 2863865779.9  |
| <i>Proline</i>                                   | 1.638           | 86.4                       | 2252165470.6  |
| <i>L-Norleucine</i>                              | 2.194           | 84.5                       | 2231210211.0  |
| <i>Esculetin</i>                                 | 6.84            | 87.9                       | 2014284782.1  |
| <i>DL-Arginine</i>                               | 1.399           | 90.9                       | 1514149881.3  |
| <i>2-Hydroxycinnamic acid</i>                    | 2.096           | 88.2                       | 1316662583.1  |
| <i>Glycerophospho-N-palmitoyl ethanolamine</i>   | 21.336          | 75.3                       | 1259469631.4  |
| <i>Morin</i>                                     | 11.658          | 91.1                       | 1152442324.5  |
| <i>Apigenin</i>                                  | 13.412          | 95.4                       | 1058778191.1  |
| <i>Prolylleucine</i>                             | 1.959           | 80.4                       | 992470630.1   |
| <i>Quercetin-3<math>\beta</math>-D-glucoside</i> | 8.74            | 89.3                       | 974293833.9   |
| <i>Valine</i>                                    | 1.895           | 89.7                       | 870666506.6   |
| <i>Sedanolide</i>                                | 14.078          | 74.4                       | 852700142.4   |
| <i>Nicotinamide</i>                              | 1.907           | 92.4                       | 812476208.6   |
| <i>Eriodictyol</i>                               | 8.336           | 75.1                       | 765907026.5   |
| <i>5<math>\alpha</math>-Dihydrotestosterone</i>  | 22.918          | 81.8                       | 749525529.9   |
| <i>2-Amino-1,3,4-octadecanetriol</i>             | 19.756          | 73.4                       | 749464263.5   |
| <i>Daidzein</i>                                  | 23.061          | 85.3                       | 749389562.3   |

|                                                    |         |      |             |
|----------------------------------------------------|---------|------|-------------|
| <i>Nicotinic acid</i>                              | 1.903   | 94.3 | 690434279.5 |
| <i>Butein</i>                                      | 11.087  | 73   | 684289300.9 |
| <i>Osajin</i>                                      | 19.175  | 74.7 | 655181530.9 |
| <i>Isoliquiritigenin</i>                           | 14.547  | 97.4 | 589212331.0 |
| <i>Maltol</i>                                      | 5.271   | 92.4 | 509654616.6 |
| <i>N-(2,4-Dimethylphenyl)formamide</i>             | 8.987   | 74.5 | 495202891.2 |
| <i>Asparagine</i>                                  | 1.567   | 86.8 | 480269320.3 |
| <i>N-<math>\alpha</math>-L-Acetyl-arginine</i>     | 1.517   | 90.9 | 470380569.5 |
| <i>Formononetin</i>                                | 24.467  | 84.4 | 462091743.5 |
| <i>Ethyl oleate</i>                                | 23.867  | 85.5 | 456297249.0 |
| <i>Mono(2-ethylhexyl) phthalate (MEHP)</i>         | 22.357  | 84.6 | 431506390.6 |
| <i>Thymine</i>                                     | 2.272   | 85.5 | 409324195.0 |
| <i>Adenine</i>                                     | 1.883   | 86.6 | 392298019.8 |
| <i>19-Nortestosterone</i>                          | 15.347  | 86.1 | 358119948.8 |
| <i>Ursolic acid</i>                                | 25.278  | 86.2 | 331350824.1 |
| <i>Taxifolin</i>                                   | 8.704   | 87.8 | 318079047.9 |
| <i>(<math>\pm</math>)-Abscisic acid</i>            | 6.665   | 82   | 312320913.6 |
| <i>DL-Stachydrine</i>                              | 2.125   | 85.1 | 308715206.7 |
| <i>2'-O-Methyladenosine</i>                        | 2.464   | 81.7 | 307468578.7 |
| <i>2,6-Di-tert-butyl-1,4-benzoquinone</i>          | 16.263  | 70.2 | 282439446.1 |
| <i>Alternariol</i>                                 | 10.334  | 74.8 | 272843113.9 |
| <i>3-Succinoylpyridine</i>                         | 6       | 71.7 | 259150576.9 |
| <i>Resveratrol</i>                                 | 11.61   | 91.5 | 256913361.0 |
| <i><math>\alpha</math>-Linolenoyl ethanolamide</i> | 18.283  | 73   | 251212999.2 |
| <i>Piceatannol</i>                                 | 18.624  | 81.8 | 239327352.3 |
| <i>4-Acetamidobutanoic acid</i>                    | 2.312   | 78.3 | 238796218.0 |
| <i>Coumarin</i>                                    | 8.183   | 76.5 | 236230469.2 |
| <i>Vanillin</i>                                    | 9.117   | 78   | 217152031.9 |
| <i>8-Hydroxyquinoline</i>                          | 10.657  | 89.5 | 198948175.7 |
| <i>D-Glucosamine</i>                               | 1.405   | 90.3 | 198922095.2 |
| <i>Pyridoxine</i>                                  | 1.95475 | 86.9 | 194336849.5 |
| <i>Citrinin</i>                                    | 13.703  | 71.5 | 194025789.1 |
| <i>Uracil</i>                                      | 1.997   | 83.2 | 188221301.4 |
| <i>Oleamide</i>                                    | 26.095  | 87.7 | 184056880.1 |
| <i>Kojic acid</i>                                  | 5.543   | 86.4 | 180254958.3 |
| <i>Palmitoleic acid</i>                            | 25.888  | 86.7 | 174478300.6 |
| <i>Estriol</i>                                     | 16.688  | 78.2 | 172035612.6 |
| <i>Vitexin</i>                                     | 9.337   | 81.9 | 169889993.3 |

|                                       |        |      |             |
|---------------------------------------|--------|------|-------------|
| <i>trans-Cinnamaldehyde</i>           | 5.442  | 82.2 | 167977100.8 |
| <i>Methyl cinnamate</i>               | 10.169 | 80.4 | 159884553.0 |
| <i>Naringenin</i>                     | 13.537 | 87   | 157819806.1 |
| <i>Hypoxanthine</i>                   | 2.118  | 83   | 149428042.3 |
| <i>Purpurin</i>                       | 11.052 | 79.4 | 149236385.0 |
| <i>3-Methoxybenzaldehyde</i>          | 4.444  | 81.1 | 146455494.5 |
| <i>Norfentanyl</i>                    | 13.52  | 75.2 | 135939645.2 |
| <i>Isophorone</i>                     | 10.992 | 82.8 | 117000118.5 |
| <i>Isorhamnetin</i>                   | 12.016 | 84.2 | 115973391.9 |
| <i>Trigonelline</i>                   | 1.472  | 93.8 | 115942385.5 |
| <i>8Z,11Z,14Z-Eicosatrienoic acid</i> | 22.938 | 85.9 | 114726528.0 |
| <i>Kuromanin</i>                      | 10.409 | 82.1 | 112970307.4 |
| <i>Nootkatone</i>                     | 20.758 | 90.2 | 111785757.4 |
| <i>3,4-Dihydroxybenzaldehyde</i>      | 9.58   | 85.9 | 107114123.4 |
| <i>Emodin</i>                         | 10.652 | 81.1 | 106612215.4 |
| <i>Oxymatrine</i>                     | 12.952 | 78.6 | 103455746.7 |
| <i>2,3-Dihydroxybenzoic acid</i>      | 12.153 | 82.1 | 102202602.7 |
| <i>Cuminaldehyde</i>                  | 9.543  | 77.5 | 100338123.8 |
| <i>Apocynin</i>                       | 4.78   | 71.7 | 98155032.6  |
| <i>Guanine</i>                        | 1.883  | 88.4 | 96039704.0  |
| <i>18-β-Glycyrrhetic acid</i>         | 20.982 | 92.3 | 95085329.7  |
| <i>Polygodial</i>                     | 21.439 | 81.3 | 93530786.5  |
| <i>Kaempferol</i>                     | 13.681 | 91.8 | 91488538.5  |
| <i>6-Methylquinoline</i>              | 6.477  | 73.8 | 82755522.6  |
| <i>Carvone</i>                        | 15.02  | 89.2 | 72194810.1  |
| <i>Biochanin A</i>                    | 13.8   | 72.4 | 71148967.2  |
| <i>2,6-Diethylaniline</i>             | 8.691  | 70.2 | 67662060.3  |
| <i>2'-O-Methylguanosine</i>           | 2.775  | 81.4 | 67386521.1  |
| <i>Chrysin</i>                        | 18.155 | 84.9 | 67152653.8  |
| <i>Glycitein</i>                      | 16.565 | 90   | 65693330.1  |
| <i>4-Hydroxybenzaldehyde</i>          | 8.335  | 79.6 | 64739878.4  |
| <i>Chlorogenic acid</i>               | 5.914  | 90.1 | 59539551.7  |
| <i>Icaritin</i>                       | 19.544 | 80.6 | 57693801.2  |
| <i>L-Histidine</i>                    | 1.325  | 90   | 56662496.7  |
| <i>Betulin</i>                        | 19.202 | 85.4 | 55867864.3  |
| <i>N-Acetyl-DL-tryptophan</i>         | 10.179 | 71.6 | 52911934.2  |
| <i>Penicillic acid</i>                | 6      | 71.7 | 48774418.7  |
| <i>4'-Methoxyacetophenone</i>         | 7.769  | 77.8 | 48540550.1  |
| <i>4-Coumaric acid</i>                | 9.238  | 84.2 | 47549325.2  |

|                                                           |        |      |            |
|-----------------------------------------------------------|--------|------|------------|
| <i>Aflatoxin G1</i>                                       | 12.294 | 78.2 | 46496795.2 |
| <i>Quercetin</i>                                          | 11.065 | 78.8 | 41805137.1 |
| <i>Jasmonic acid</i>                                      | 13.328 | 76.3 | 41743852.2 |
| <i>Arachidonic acid</i>                                   | 23.729 | 79.9 | 39228029.0 |
| <i>Puerarin</i>                                           | 7.82   | 93   | 38199100.8 |
| <i>Prunin</i>                                             | 10.569 | 86.1 | 34734343.0 |
| <i>Acetophenone</i>                                       | 8.847  | 70.9 | 27001052.7 |
| <i>Capsaicin</i>                                          | 12.386 | 71.6 | 26277452.5 |
| <i>3-Acetyl-11-keto-<math>\beta</math>-boswellic acid</i> | 21.537 | 72.6 | 13182932.9 |
| <i>2-Hydroxybenzothiazole</i>                             | 20.48  | 85.3 | 1977624.8  |
| <i>Caprolactam</i>                                        | 19.875 | 86   | 1777756.9  |
